# Supplementary material for: Two Novel Dermaseptin-Like Antimicrobial Peptides with Anticancer Activities from the Skin Secretion of Pachymedusa dacnicolor
Source: MDPI journal article supplement (doi:10.3390/toxins8050144), 2016-05-12
Supplement: s1 [file s1]

## Supplementary Materials: Two Novel Dermaseptin-Like Antimicrobial Peptides with Anticancer Activities from the Skin Secretion of *Pachymedusa dactylorhiza*

Danling Shi, Xiaojuan Hou, Lei Wang, Yitian Gao, Di Wu, Xinping Xi, Mei Zhou, Hang Fai Kwok, Jinao Duan, Tianbao Chen and Chris Shaw

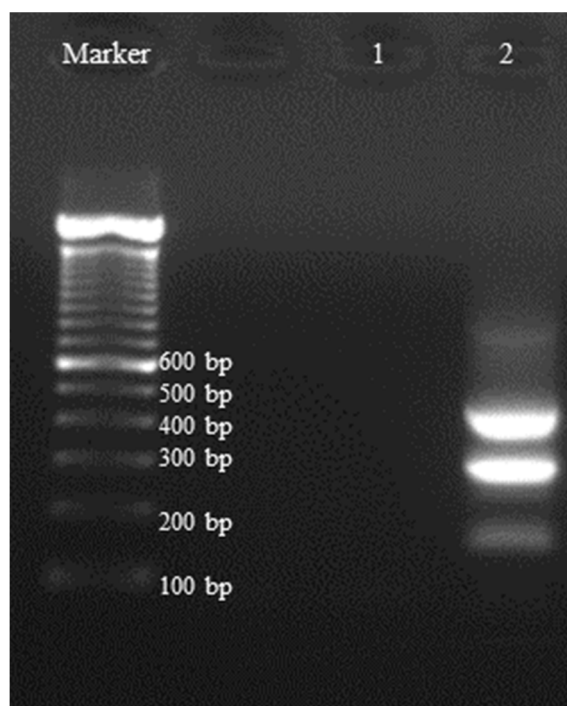

**Figure S1.** Gel electrophoresis of RACE PCR products from *Pachymedusa dactylorhiza* skin secretion cDNAs library. The negative control (1) was performed using PCR grade water instead of the cDNA template which was used in the sample (2).
